# Supplementary material for: Genetic evidence for a pathogenic role for the vitamin D3 metabolizing enzyme CYP24A1 in multiple sclerosis
Source: PubMed Central journal article supplement (PMC4278441; doi:10.1016/j.msard.2013.08.009), 2014-03

# Supplementary Figure 1

**A**

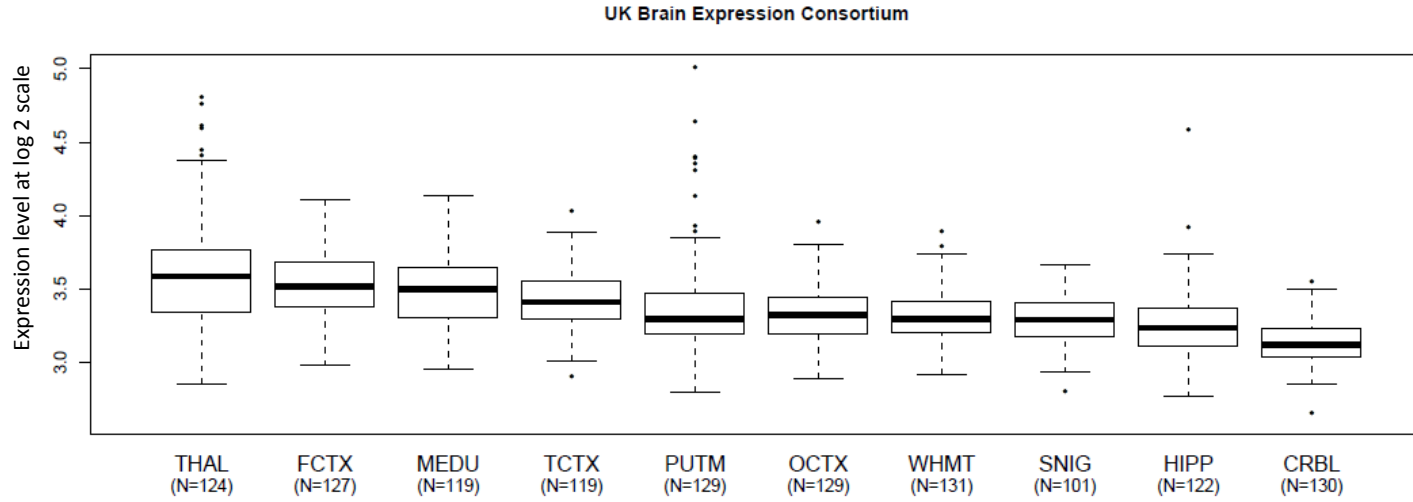

**B**

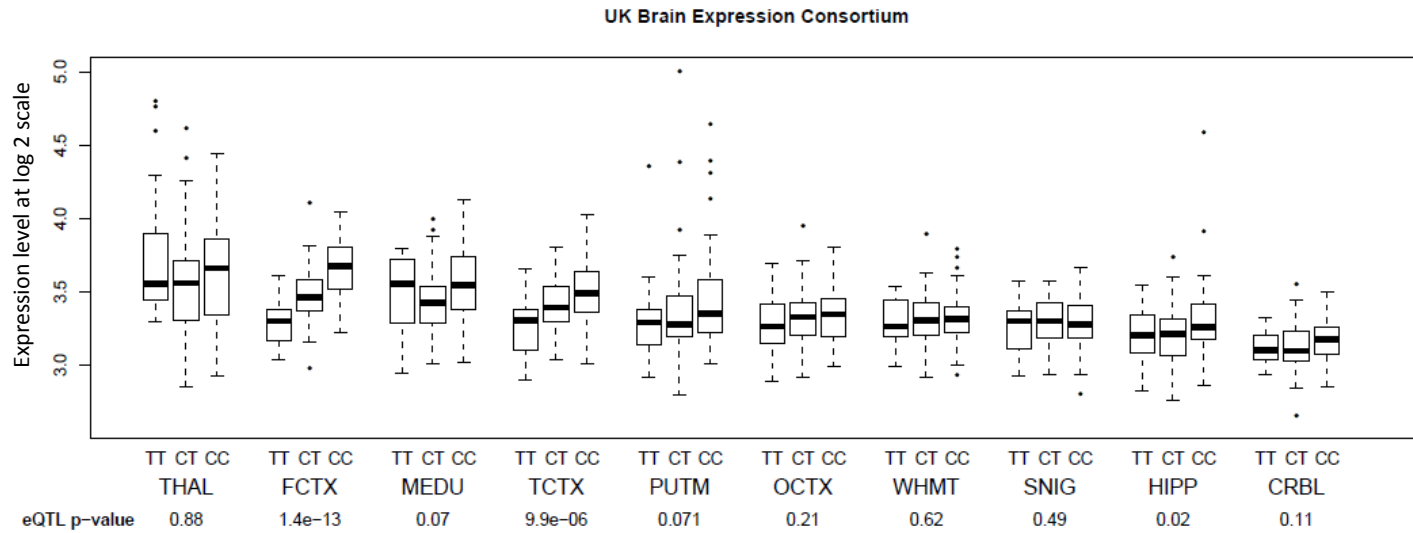

Supplement: mmc1.pdf [file mmc1.pdf]
