# Supplementary material for: Genetic evidence for a pathogenic role for the vitamin D3 metabolizing enzyme CYP24A1 in multiple sclerosis
Source: PubMed Central journal article supplement (PMC4278441; doi:10.1016/j.msard.2013.08.009), 2014-03

## Supplementary Figure 2

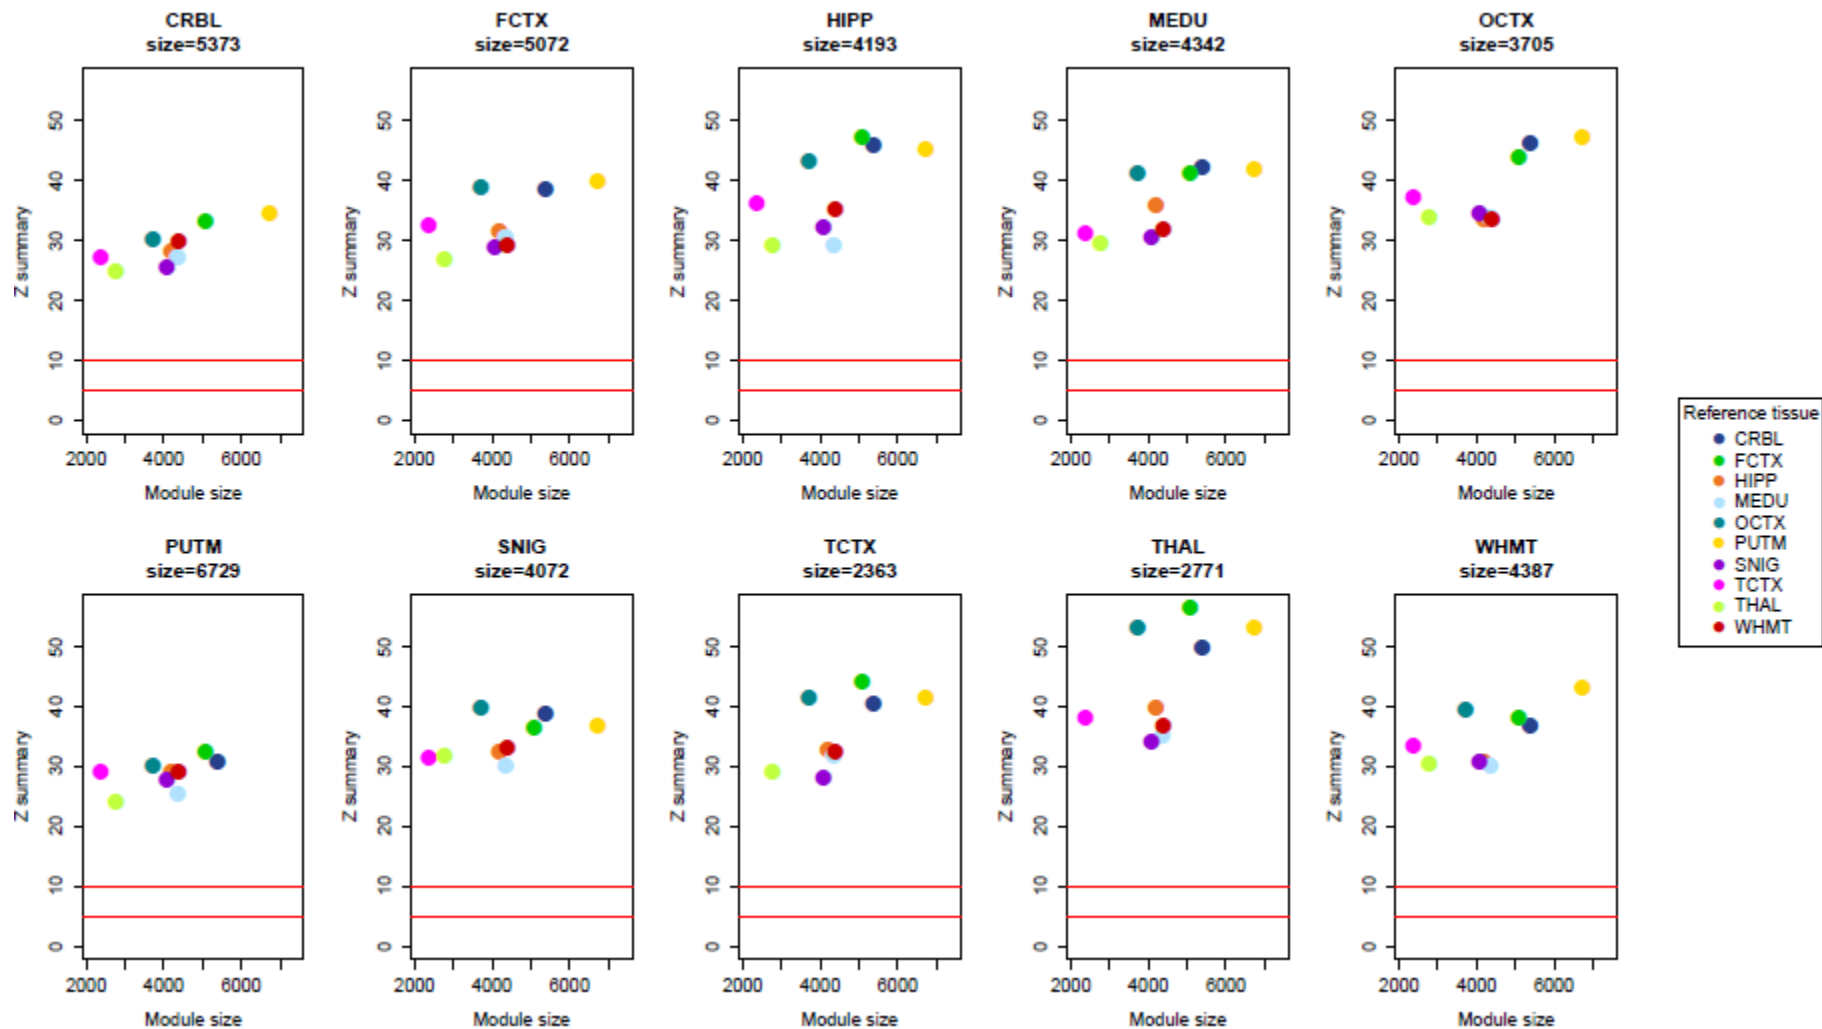

Supplement: mmc2.pdf [file mmc2.pdf]
